# Supplementary material for: Coordination-responsive selenium-containing polymer micelles for controlled drug release
Source: Royal Society of Chemistry journal article supplement (doi:10.1039/c2sc21315j), 2012-01-01
Supplement: c2sc21315j.pdf [file c2sc21315j.pdf]

# Coordination-responsive Selenium-containing Polymer Micelles for Controlled Drug Release

Wei Cao,<sup>a</sup> Yang Li,<sup>b</sup> Yu Yi,<sup>a</sup> Shaobo Ji,<sup>a</sup> Lingwu Zeng,<sup>a</sup> Zhiwei Sun,<sup>\*c</sup> and Huaping Xu<sup>\*a</sup>

<sup>a</sup>Key Lab of Organic Optoelectronics & Molecular Engineering, Department of Chemistry, Tsinghua University, Beijing 100084, China

<sup>b</sup>Department of Toxicology, School of Public Health, Jilin University, Changchun, Jilin, 130021, China

<sup>c</sup>School of Public Health and Family Medicine, Capital Medical University, Beijing 100069, China

## Supporting information

### Calculated MALDI-TOF spectrum

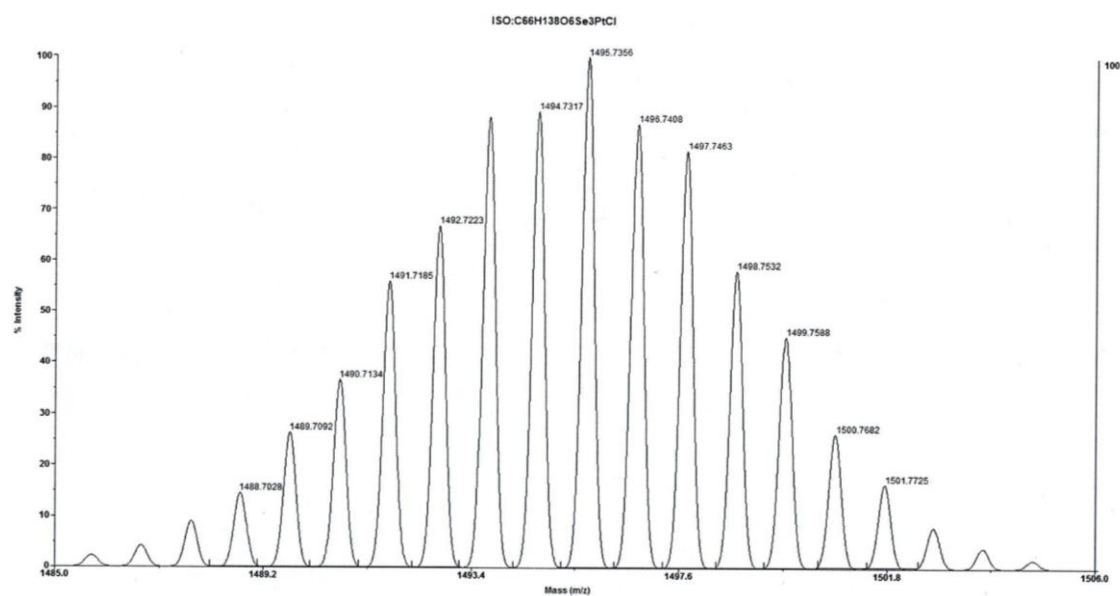

**Figure S 1** Calculated MALDI-TOF spectrum of the a coordination fragment of M-SeOH-PtCl<sub>2</sub>, [Pt(M-SeOH)<sub>3</sub>Cl]<sup>+</sup>

## Synthesis

The selenide-containing polyurethane (PUSe) blocks were terminated by PEG monomethyl ether of different molecular weight, including 1900g/mol and 5000 g/mol. The molecular weight of PEG-PUSe-PEG1900 and PEG-PUSe-PEG5000 was determined by  $^1\text{H}$  NMR to be  $3.8 \times 10^4$  g/mol and  $2.9 \times 10^4$  g/mol, respectively. For PEG-PUSe-PEG1900,  $n=58$ . While for PEG-PUSe-PEG5000,  $n=31$ .

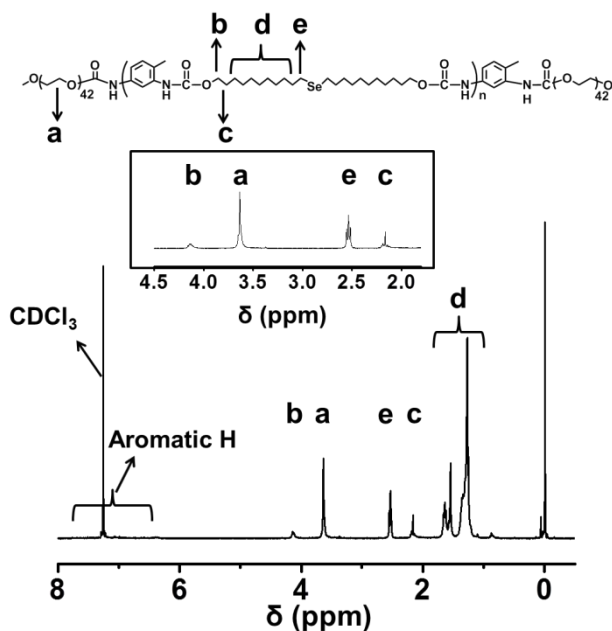

Figure S 2  $^1\text{H}$  NMR spectrum of PEG-PUSe-PEG1900, 600MHz, solvent:  $\text{CDCl}_3$ .

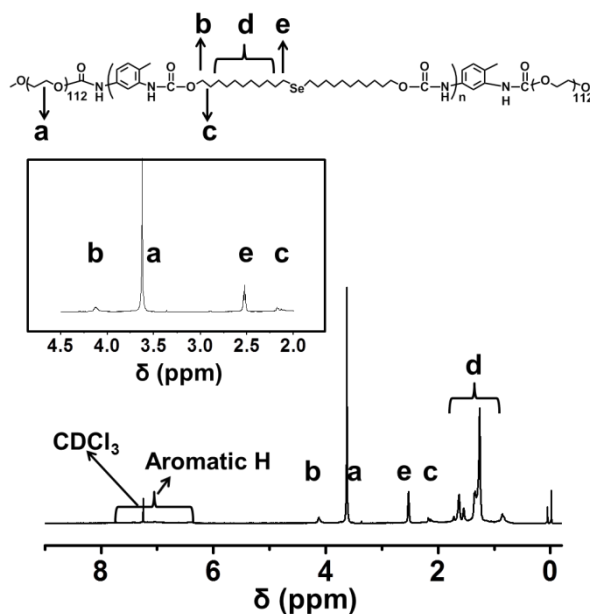

Figure S 3  $^1\text{H}$  NMR spectrum of PEG-PUSe-PEG5000, 600MHz, solvent:  $\text{CDCl}_3$ .

### Self-assembly behaviors of PEG-PUSe-PEG

PEG-PUSe-PEG copolymer can self-assemble to aggregates in an aqueous environment because of its amphiphilic nature. The critical aggregate concentration (CAC) of PEG-PUSe-PEG1900 was determined by the fluorescent probe method using pyrene as the probe<sup>1</sup> to be  $3.2 \times 10^{-3}$  mg/mL. The size of the aggregates was  $\sim 65$  nm average diameter, measured by dynamic light scattering (DLS) measurements. Transmission electron microscopy (TEM) was employed to observe the morphology of the aggregates. The results show (Figure S 4) that the aggregates are micellar structure with solid cores. Similarly, the CAC of PEG-PUSe-PEG5000 was determined to be  $6.3 \times 10^{-3}$  mg/mL, as shown in Figure S 5. In addition, it was found that PEG-PUSe-PEG5000 forms micellar aggregates with a hydrodynamic diameter of about 55 nm.

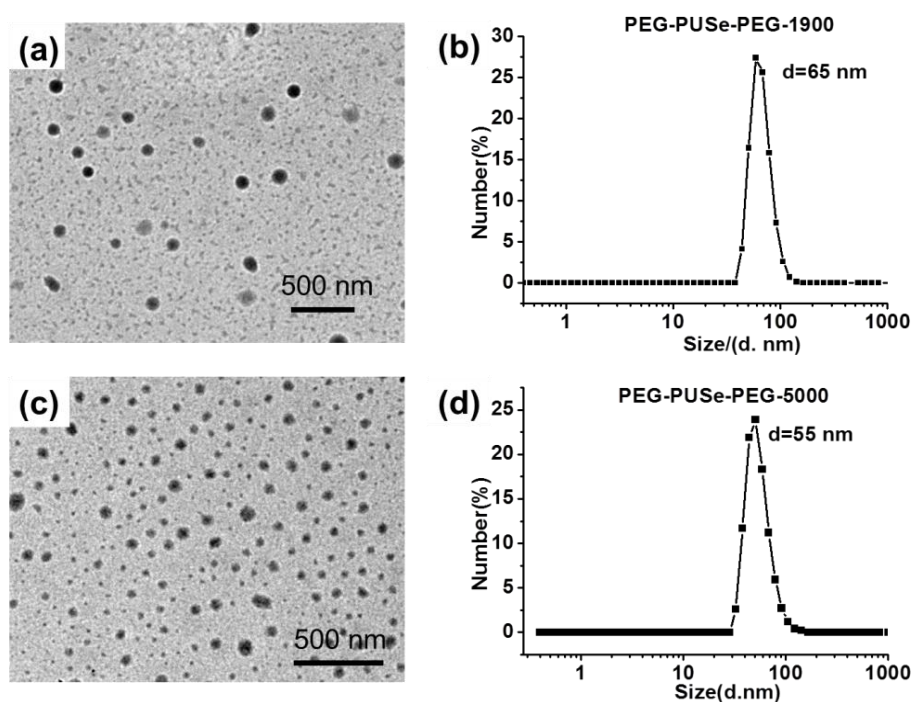

**Figure S 4** Self-assembly behaviours of PEG-PUSe-PEG. TEM images of aggregates, PEG-PUSe-PEG1900 (a), PEG-PUSe-PEG5000 (c), stained by 1.5% uranium acetate. DLS determination of PEG-PUSe-PEG1900 (b), PEG-PUSe-PEG5000 (d).

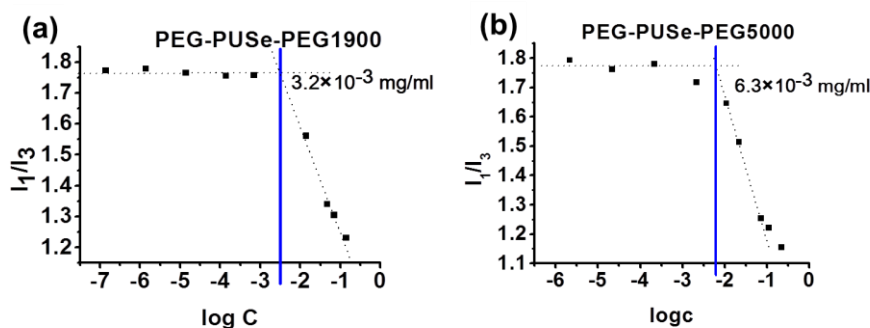

**Figure S 5** Determination of CAC of PEG-PUSe-PEG using the fluorescent method with pyrene as a probe.  $I_1/I_3$  refers to the fluorescence intensity ratio of the emission intensity of the first and third bands in the fluorescence spectrum of pyrene. (a) PEG-PUSe-PEG1900 (b) PEG-PUSe-PEG5000.

### DLS study for the Pt-coordinating micelles of PEG-PUSe-PEG1900

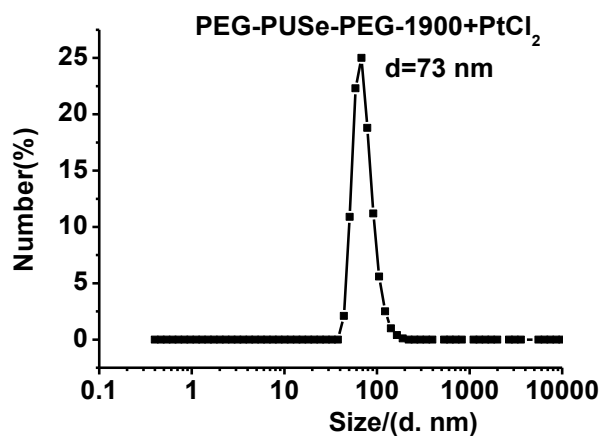

Figure S 6 DLS result for the Pt-coordinating aggregates of PEG-PUSe-PEG1900.

### Colloidal studies based on DLS

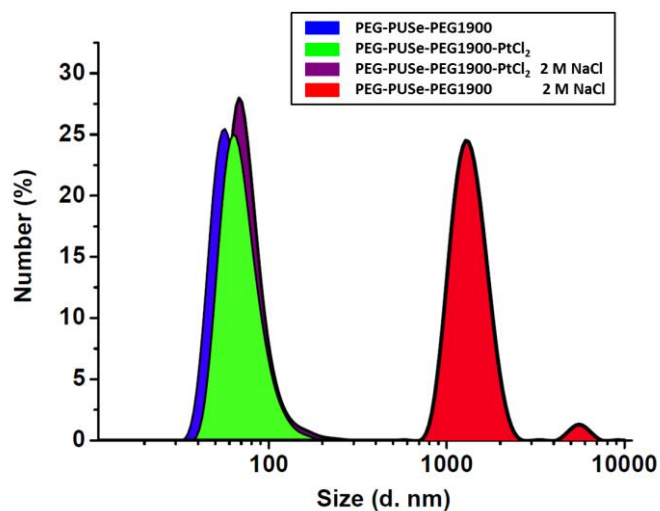

Figure S 7 Colloidal studies based on DLS of PEG-PUSe-PEG1900 micelles and Pt-coordinating micelles in water and at high salt concentration (2 M NaCl)

### Self-assembly behaviors of PEG-PUSe-PEG5000 / PtCl<sub>2</sub> complex

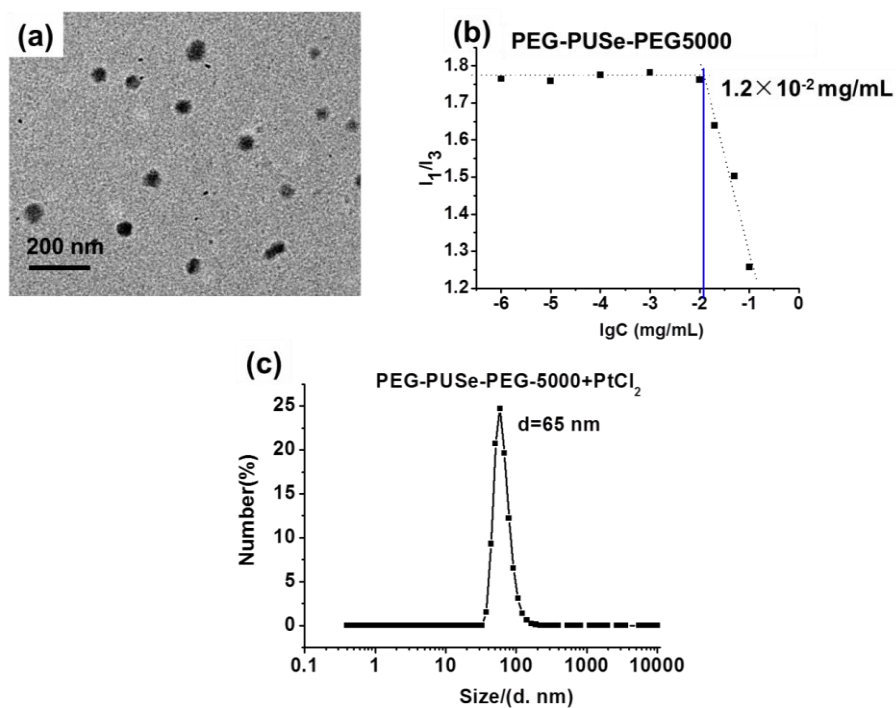

**Figure S 8** Self-assembly behaviours of PEG-PUSe-PEG5000 / PtCl<sub>2</sub> complex. (a) TEM images of aggregates, without staining, (b) the CAC determination of PEG-PUSe-PEG5000/Pt complexes. (c) DLS result for the Pt-coordinating aggregates of PEG-PUSe-PEG5000.

### Fluorescent spectra of Dox-loaded Pt-coordinating micelles of PEG-PUSe-PEG1900

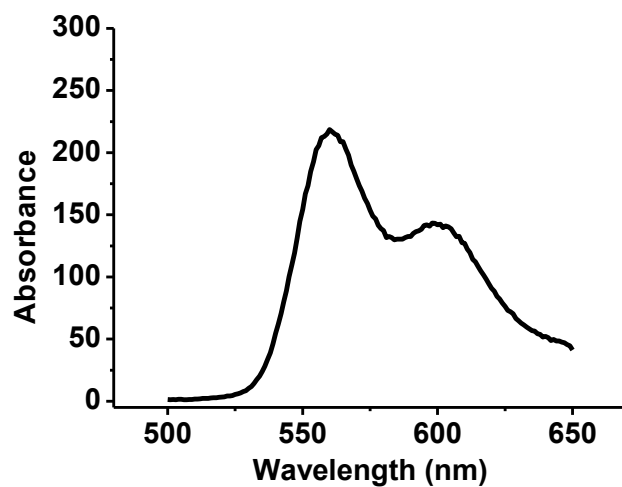

**Figure S 9** Fluorescent spectra of Dox-loaded Pt-coordinating micelles of PEG-PUSe-PEG1900 desolved in 4 times its volume of DMF.

### Morphology of the Dox-loaded Pt-coordinating micelles of PEG-PUSe-PEG5000

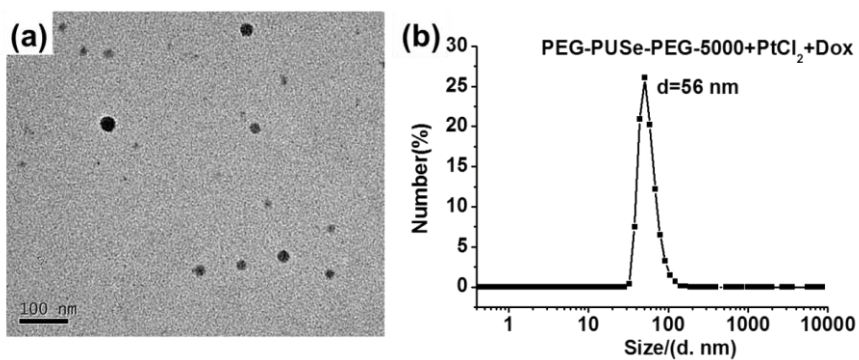

**Figure S 10** Morphology of the Dox-loaded Pt-coordinating micelles of PEG-PUSe-PEG5000. (a) TEM images of coordination micelles without staining, (b) DLS result for the micelles.

### Mass spectra for competitive coordination

PtCl<sub>2</sub> was added into the aqueous solution of GSH under sonication, the resulting solution was tested by ESI-MS (Figure S 11).

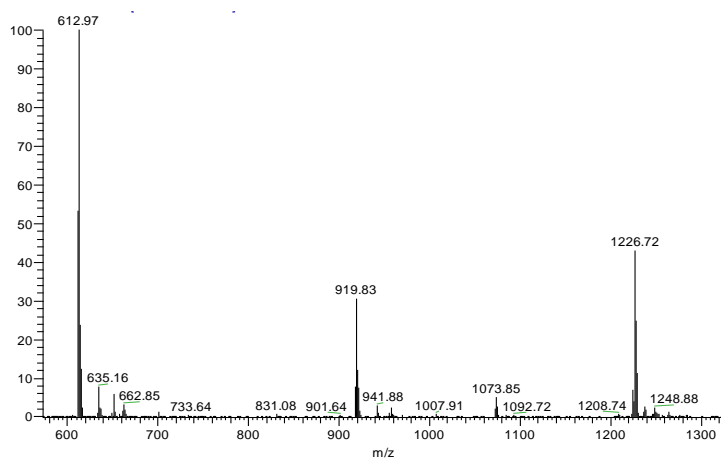

Figure S 11 ESI-MS spectrum of the complex formed by GSH and PtCl<sub>2</sub>.

0.1mmol GSH was mixed with 1 mL 0.01 mM aqueous solution of M-SeOH+PtCl<sub>2</sub>, the solution was then measured by ESI-MS. As shown in Figure S 12, a peak at m/z 1226.68, in agreement with [Pt(GSH)<sub>3</sub>Cl]<sup>-</sup> (+Br), was observe, while the peak for the complex of M-SeOH and Pt disappeared. The results indicate that GSH coordinate better with platinum and can replace the selenium-containing ligand.

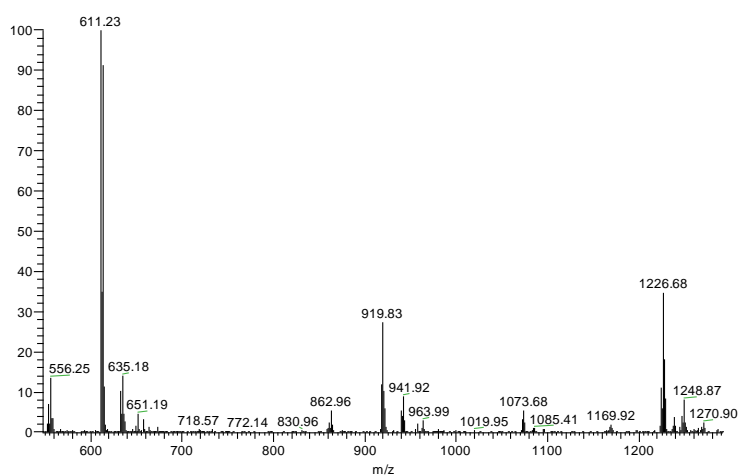

Figure S 12 ESI-MS spectrum of the production of competitive coordination.

### In vitro release

Similarly, as shown in Figure S 13, Dox loaded in the coordination micelles of PEG-PUSe-PEG5000 was also released in a GSH-rich environment.

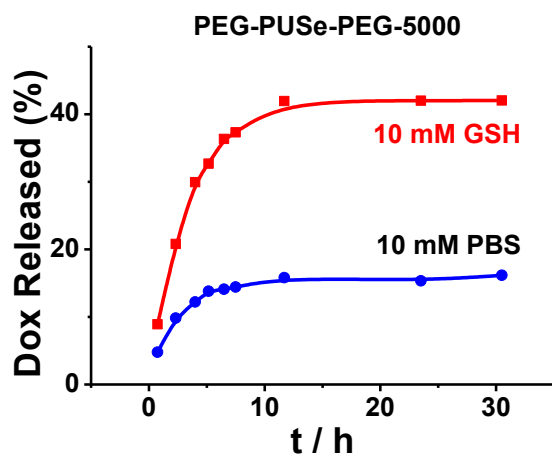

**Figure S 13** In vitro release plot of Dox -loaded platinum-coordinating micelles of PEG-PUSe-PEG5000 with and without GSH at pH 7.4 and 37 °C.

### MTT assays of cisplatin-containing micelles of PEG-PUSe-PEG5000.

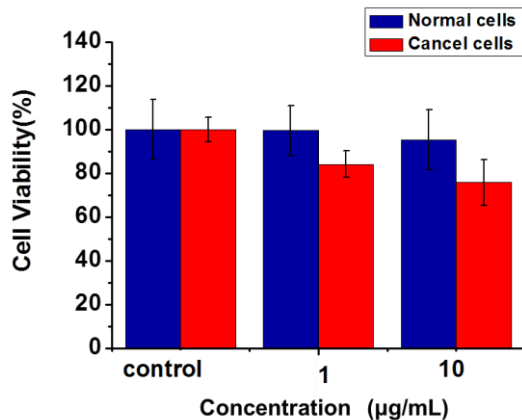

**Figure S 14** MTT assays of cisplatin-containing micelles of PEG-PUSe-PEG5000 based on human normal liver L-02 cells and human hepatocellular liver carcinoma cell line (HepG2). The cells were incubated for 24 h with micelles. Data are presented as the average  $\pm$  standard deviation (n=6).

1. T. Cao, P. Munk, C. Ramireddy, Z. Tuzar and S. E. Webber, *Macromolecules*, 1991, **24**, 6300-6305.
